# Supplementary material
Source: PubMed Central journal article supplement (PMC6439771)

## Supplementary Online Content

Liu P-H, Wu K, Ng K, et al. Association of Obesity With Risk of Early-Onset Colorectal Cancer Among Women. *JAMA Oncol*. Published October 11, 2018. doi:10.1001/jamaoncol.2018.4280

**eTable 1.** Baseline Characteristics According to BMI in NHSII, 1989

**eTable 2.** Sensitivity Analysis on BMI and Risk of Early-Onset Colorectal Cancer

**eTable 3.** Current BMI and Risk of Early-Onset Colorectal Cancer According to Tumor Characteristics

**eTable 4.** Current BMI and Risk of Early-Onset Colorectal Cancer According to Smoking Status and Physical Activity Level

**eTable 5.** BMI at Age 18, Change in Body Weight Since Age 18, and Risk of Early-Onset Colorectal Cancer

**eTable 6.** Body Shape at Age 5, 10, and 20 and Risk of Early-Onset Colorectal Cancer

**eTable 7.** Change in Body Shape (Pictogram) and Risk of Early-Onset Colorectal Cancer

**eTable 8.** BMI, Weight Change, and Risk of Colorectal Cancer After Age 50

**eFigure.** Non-parametric Restricted Cubic Splines of (A) Current BMI, (B) BMI at Age 18, and (C) Weight Change Since Age 18 and Risk of Early-Onset Colorectal Cancer

This supplementary material has been provided by the authors to give readers additional information about their work.

**eTable 1. Baseline characteristics according to BMI in NHSII, 1989**

| Characteristics <sup>a</sup>                                                   | Baseline BMI (1989)         |                           |                           |                        |
|--------------------------------------------------------------------------------|-----------------------------|---------------------------|---------------------------|------------------------|
|                                                                                | 18.5-22.9 kg/m <sup>2</sup> | 23-24.9 kg/m <sup>2</sup> | 25-29.9 kg/m <sup>2</sup> | ≥ 30 kg/m <sup>2</sup> |
| Age, years                                                                     | 34.4 (4.6)                  | 35.1 (4.7)                | 35.5 (4.6)                | 35.9 (4.5)             |
| BMI at age 18, kg/m <sup>2</sup>                                               | 19.9 (2.0)                  | 21.4 (2.5)                | 22.6 (3.0)                | 25.9 (4.8)             |
| Weight change since age 18, kg                                                 | 2.8 (5.4)                   | 6.6 (6.8)                 | 12.1 (8.7)                | 24.8 (14.3)            |
| Height, cm                                                                     | 165 (7)                     | 164 (6)                   | 165 (7)                   | 164 (7)                |
| Postmenopausal, %                                                              | 2.0                         | 2.3                       | 2.4                       | 3.3                    |
| Family history of colorectal cancer, %                                         | 4.2                         | 4.1                       | 4.3                       | 4.0                    |
| Screening lower endoscopy within past 10 years, %                              | 1.2                         | 1.3                       | 1.3                       | 1.2                    |
| Lower endoscopy due to other indications within past 10 years <sup>b</sup> , % | 1.7                         | 1.9                       | 1.9                       | 2.5                    |
| History of diabetes, %                                                         | 0.7                         | 0.9                       | 1.4                       | 4.6                    |
| Ever smokers, %                                                                | 34                          | 35                        | 35                        | 34                     |
| Pack-years among ever smokers                                                  | 10.8 (7.9)                  | 11.6 (8.2)                | 12.0 (8.2)                | 12.4 (8.6)             |
| Alcohol intake, g/day                                                          | 4.3 (7.4)                   | 4.0 (7.1)                 | 3.5 (6.9)                 | 2.3 (5.8)              |
| Physical activity, MET-hours/week                                              | 26.9 (37.9)                 | 23.8 (34.6)               | 21.4 (31.4)               | 17.4 (27.8)            |
| Regular aspirin use, %                                                         | 11                          | 11                        | 12                        | 13                     |
| Regular NSAID use, %                                                           | 17                          | 19                        | 22                        | 28                     |
| Current use of multivitamin, %                                                 | 47                          | 45                        | 44                        | 41                     |
| Total calories, kcal/day                                                       | 1,771 (538)                 | 1,772 (538)               | 1,807 (559)               | 1,851 (576)            |
| Red meat intake, servings/week                                                 | 5.6 (4.4)                   | 6.1 (4.5)                 | 6.6 (4.8)                 | 7.5 (5.3)              |
| Fiber intake, g/day                                                            | 18.5 (5.7)                  | 18.4 (5.4)                | 18.2 (5.2)                | 17.5 (5.1)             |
| Folate intake, µg/day                                                          | 490 (296)                   | 478 (291)                 | 464 (282)                 | 437 (271)              |
| Calcium intake, mg/day                                                         | 1,027 (443)                 | 1,025 (433)               | 1,019 (432)               | 984 (425)              |
| Alternate Healthy Eating Index 2010                                            | 44.4 (10.5)                 | 44.3 (10.4)               | 43.8 (10.2)               | 42.2 (10.4)            |

Abbreviations: BMI, body mass index; MET, metabolic equivalent of tasks; NSAID, non-steroid anti-inflammatory drugs.

<sup>a</sup> Mean (SD) is presented for continuous variables.

<sup>b</sup> Lower endoscopy due to indications other than for screening (e.g. having symptoms, family history of colorectal cancer, follow-up endoscopy, or positive fecal occult blood test)

**eTable 2. Sensitivity analysis on BMI and risk of early-onset colorectal cancer**

|                                                 | <b>BMI</b>                  |                           |                           |                        |                                   |                              |
|-------------------------------------------------|-----------------------------|---------------------------|---------------------------|------------------------|-----------------------------------|------------------------------|
|                                                 | 18.5-22.9 kg/m <sup>2</sup> | 23-24.9 kg/m <sup>2</sup> | 25-29.9 kg/m <sup>2</sup> | ≥ 30 kg/m <sup>2</sup> | Each 5 kg/m <sup>2</sup> increase | <i>P</i> -trend <sup>c</sup> |
| <b>Cumulative average BMI</b>                   |                             |                           |                           |                        |                                   |                              |
| Cases                                           | 37                          | 20                        | 36                        | 21                     |                                   |                              |
| Person-years                                    | 522,309                     | 226,168                   | 273,390                   | 174,585                |                                   |                              |
| Age-adjusted RR (95% CI)                        | 1 [Reference]               | 1.12 (0.65-1.93)          | 1.62 (1.02-2.57)          | 1.44 (0.84-2.46)       | 1.16 (1.00-1.35)                  | 0.06                         |
| Multivariable-adjusted RR (95% CI) <sup>b</sup> | 1 [Reference]               | 1.15 (0.67-1.99)          | 1.63 (1.02-2.62)          | 1.50 (0.85-2.64)       | 1.18 (1.00-1.39)                  | 0.05                         |
|                                                 |                             |                           |                           |                        |                                   |                              |
| <b>BMI with 4-year lag</b>                      |                             |                           |                           |                        |                                   |                              |
| Cases                                           | 29                          | 14                        | 27                        | 25                     |                                   |                              |
| Person-years                                    | 374,706                     | 166,090                   | 213,305                   | 155,853                |                                   |                              |
| Age-adjusted RR (95% CI)                        | 1 [Reference]               | 0.97 (0.51-1.84)          | 1.41 (0.83-2.40)          | 1.67 (0.97-2.87)       | 1.17 (1.01-1.36)                  | 0.04                         |
| Multivariable-adjusted RR (95% CI) <sup>b</sup> | 1 [Reference]               | 1.03 (0.54-1.95)          | 1.42 (0.83-2.43)          | 1.77 (1.00-3.11)       | 1.20 (1.02-1.40)                  | 0.02                         |

Abbreviations: BMI, body mass index; CI, confidence interval; RR, relative risk.

<sup>a</sup> Cumulative-average BMI was calculated as averages of BMI reported up until the current cycle. For example, cumulative-average BMI at 1993 is the average of BMI in 1989, 1991, and 1993. Lag BMI was calculated using BMI 4 years before each cycle. As an example, person-time and early-onset CRC accrued during 1995-1997 were analyzed according to BMI in 1991.

<sup>b</sup> Additionally adjusted for height (continuous), family history of CRC (yes/no), history of diabetes (yes/no), screening lower endoscopy within past 10 years (yes/no), lower endoscopy due to other indications within past 10 years (yes/no), smoking pack-years (continuous), physical activity (continuous), alcohol intake (continuous), regular use of aspirin (yes/no), NSAID (yes/no), multivitamin (yes/no), menopausal status (premenopausal or postmenopausal), menopausal hormone use (never, past, and current use of menopausal hormones), and dietary intake (total calories, red meat, fiber, folate, calcium, Alternate Healthy Eating Index 2010, continuous).

<sup>c</sup> Calculated using cumulative average BMI as a continuous variable.

**eTable 3. Current BMI and risk of early-onset colorectal cancer according to tumor characteristics**

|                                                 | Current BMI                 |                           |                           |                        | <i>P</i> -trend <sup>b</sup> |
|-------------------------------------------------|-----------------------------|---------------------------|---------------------------|------------------------|------------------------------|
|                                                 | 18.5-22.9 kg/m <sup>2</sup> | 23-24.9 kg/m <sup>2</sup> | 25-29.9 kg/m <sup>2</sup> | ≥ 30 kg/m <sup>2</sup> |                              |
| <b>Colon cancer</b>                             |                             |                           |                           |                        |                              |
| Cases                                           | 21                          | 15                        | 21                        | 23                     |                              |
| Person-years                                    | 452,256                     | 217,277                   | 296,770                   | 230,180                |                              |
| Age-adjusted RR (95% CI)                        | 1 [Reference]               | 1.32 (0.68-2.57)          | 1.29 (0.70-2.37)          | 1.71 (0.94-3.11)       | 0.07                         |
| Multivariable-adjusted RR (95% CI) <sup>a</sup> | 1 [Reference]               | 1.38 (0.71-2.69)          | 1.34 (0.72-2.49)          | 1.75 (0.93-3.28)       | 0.07                         |
| <b>Rectal cancer</b>                            |                             |                           |                           |                        |                              |
| Cases                                           | 8                           | 5                         | 9                         | 12                     |                              |
| Person-years                                    | 452,270                     | 217,282                   | 296,782                   | 230,184                |                              |
| Age-adjusted RR (95% CI)                        | 1 [Reference]               | 1.13 (0.37-3.46)          | 1.42 (0.54-3.69)          | 2.23 (0.90-5.50)       | 0.06                         |
| Multivariable-adjusted RR (95% CI) <sup>a</sup> | 1 [Reference]               | 1.14 (0.37-3.52)          | 1.38 (0.52-3.66)          | 2.20 (0.85-5.66)       | 0.07                         |
| <b>Diagnosis between 1989-2001</b>              |                             |                           |                           |                        |                              |
| Cases                                           | 21                          | 13                        | 19                        | 18                     |                              |
| Person-years                                    | 370,782                     | 167,513                   | 218,268                   | 160,524                |                              |
| Age-adjusted RR (95% CI)                        | 1 [Reference]               | 1.25 (0.62-2.50)          | 1.33 (0.71-2.49)          | 1.58 (0.83-2.98)       | 0.26                         |
| Multivariable-adjusted RR (95% CI) <sup>a</sup> | 1 [Reference]               | 1.32 (0.66-2.65)          | 1.40 (0.74-2.63)          | 1.72 (0.89-3.34)       | 0.17                         |
| <b>Diagnosis after 2001</b>                     |                             |                           |                           |                        |                              |
| Cases                                           | 8                           | 7                         | 11                        | 17                     |                              |
| Person-years                                    | 81,468                      | 49,758                    | 78,495                    | 69,645                 |                              |
| Age-adjusted RR (95% CI)                        | 1 [Reference]               | 1.34 (0.48-3.70)          | 1.35 (0.54-3.38)          | 2.38 (1.02-5.53)       | 0.007                        |
| Multivariable-adjusted RR (95% CI) <sup>a</sup> | 1 [Reference]               | 1.40 (0.50-3.90)          | 1.37 (0.54-3.45)          | 2.24 (0.93-5.43)       | 0.02                         |

Abbreviations: BMI, body mass index; CI, confidence interval; RR, relative risk.

<sup>a</sup> Additionally adjusted for height (continuous), family history of CRC (yes/no), history of diabetes (yes/no), screening lower endoscopy within past 10 years (yes/no), lower endoscopy due to other indications within past 10 years (yes/no), smoking pack-years (continuous), physical activity (continuous), alcohol intake (continuous), regular use of aspirin (yes/no), NSAID (yes/no), multivitamin (yes/no), menopausal status (premenopausal or postmenopausal), menopausal hormone use (never, past, and current use of menopausal hormones), and dietary intake (total calories, red meat, fiber, folate, calcium, Alternate Healthy Eating Index 2010, continuous).

<sup>b</sup> Calculated using current BMI as a continuous variable.

**eTable 4. Current BMI and risk of early-onset colorectal cancer according to smoking status and physical activity level**

|                                                                 | Current BMI                 |                           |                           |                        | <i>P</i> -trend <sup>b</sup> |
|-----------------------------------------------------------------|-----------------------------|---------------------------|---------------------------|------------------------|------------------------------|
|                                                                 | 18.5-22.9 kg/m <sup>2</sup> | 23-24.9 kg/m <sup>2</sup> | 25-29.9 kg/m <sup>2</sup> | ≥ 30 kg/m <sup>2</sup> |                              |
| <b>Smoking status</b>                                           |                             |                           |                           |                        |                              |
| Never smokers                                                   |                             |                           |                           |                        |                              |
| Cases                                                           | 22                          | 14                        | 17                        | 22                     |                              |
| Person-years                                                    | 307,796                     | 144,486                   | 197,369                   | 154,690                |                              |
| Age-adjusted RR (95% CI)                                        | 1 [Reference]               | 1.20 (0.61-2.35)          | 1.01 (0.53-1.92)          | 1.57 (0.86-2.86)       | 0.08                         |
| Multivariable-adjusted RR (95% CI) <sup>a</sup>                 | 1 [Reference]               | 1.33 (0.67-2.62)          | 1.11 (0.58-2.12)          | 1.72 (0.91-3.25)       | 0.06                         |
| Ever smokers                                                    |                             |                           |                           |                        |                              |
| Cases                                                           | 7                           | 6                         | 13                        | 13                     |                              |
| Person-years                                                    | 144,454                     | 72,785                    | 99,394                    | 75,479                 |                              |
| Age-adjusted RR (95% CI)                                        | 1 [Reference]               | 1.56 (0.52-4.66)          | 2.33 (0.92-5.90)          | 2.91 (1.14-7.38)       | 0.04                         |
| Multivariable-adjusted RR (95% CI) <sup>a</sup>                 | 1 [Reference]               | 1.67 (0.55-5.04)          | 2.22 (0.87-5.67)          | 2.76 (1.04-7.33)       | 0.06                         |
| <b>Physical activity</b>                                        |                             |                           |                           |                        |                              |
| 4 <sup>th</sup> and 5 <sup>th</sup> quintiles (higher activity) |                             |                           |                           |                        |                              |
| Cases                                                           | 14                          | 9                         | 12                        | 14                     |                              |
| Person-years                                                    | 212,298                     | 93,357                    | 115,595                   | 69,270                 |                              |
| Age-adjusted RR (95% CI)                                        | 1 [Reference]               | 1.28 (0.55-2.97)          | 1.38 (0.63-3.03)          | 2.31 (1.07-5.00)       | 0.04                         |
| Multivariable-adjusted RR (95% CI) <sup>a</sup>                 | 1 [Reference]               | 1.34 (0.57-3.16)          | 1.42 (0.64-3.17)          | 2.35 (1.05-5.25)       | 0.07                         |
| 1 <sup>st</sup> to 3 <sup>rd</sup> quintiles (lower activity)   |                             |                           |                           |                        |                              |
| Cases                                                           | 15                          | 11                        | 18                        | 21                     |                              |
| Person-years                                                    | 239,952                     | 123,914                   | 181,168                   | 160,899                |                              |
| Age-adjusted RR (95% CI)                                        | 1 [Reference]               | 1.29 (0.59-2.80)          | 1.32 (0.66-2.65)          | 1.66 (0.84-3.21)       | 0.06                         |
| Multivariable-adjusted RR (95% CI) <sup>a</sup>                 | 1 [Reference]               | 1.35 (0.62-2.97)          | 1.33 (0.66-2.66)          | 1.65 (0.80-3.20)       | 0.07                         |

Abbreviations: BMI, body mass index; CI, confidence interval; RR, relative risk.

<sup>a</sup> Additionally adjusted for height (continuous), family history of CRC (yes/no), history of diabetes (yes/no), screening lower endoscopy within past 10 years (yes/no), lower endoscopy due to other indications within past 10 years (yes/no), smoking pack-years (continuous), physical activity (continuous), alcohol intake (continuous), regular use of aspirin (yes/no), NSAID (yes/no), multivitamin (yes/no), menopausal status (premenopausal or postmenopausal), menopausal hormone use (never, past, and current use of menopausal hormones), and dietary intake (total calories, red meat, fiber, folate, calcium, Alternate Healthy Eating Index 2010, continuous).

<sup>b</sup> Calculated using current BMI as a continuous variable.

**eTable 5. BMI at age 18, change in body weight since age 18, and risk of early-onset colorectal cancer**

| Multivariable-adjusted RR of early-onset CRC (95% CI) <sup>a</sup> | Change in body weight since age 18 |                  |                  |                  |
|--------------------------------------------------------------------|------------------------------------|------------------|------------------|------------------|
|                                                                    | Gain < 5 kg or weight loss         | Gain 5-19.9 kg   | Gain ≥ 20 kg     |                  |
| BMI at age 18                                                      | < 21 kg/m <sup>2</sup>             | 1 [Reference]    | 0.85 (0.41-1.76) | 1.80 (0.82-3.91) |
|                                                                    | 21-22.9 kg/m <sup>2</sup>          | 0.86 (0.30-2.49) | 1.36 (0.58-3.19) | 2.20 (0.93-5.18) |
|                                                                    | ≥ 23 kg/m <sup>2</sup>             | 1.82 (0.78-4.22) | 1.31 (0.51-3.35) | 2.35 (1.05-5.25) |

Abbreviations: BMI, body mass index; CI, confidence interval; CRC, colorectal cancer; RR, relative risk.

<sup>a</sup> Adjusted for age, questionnaire cycle, height (continuous), family history of CRC (yes/no), history of diabetes (yes/no), screening lower endoscopy within past 10 years (yes/no), lower endoscopy due to other indications within past 10 years (yes/no), smoking (continuous pack-years), physical activity (continuous), alcohol intake (continuous), regular use of aspirin (yes/no), NSAID (yes/no), multivitamin (yes/no), menopausal status (premenopausal or postmenopausal), menopausal hormone use (never, past, and current use of menopausal hormones), and dietary intake (total calories, red meat, fiber, folate, calcium, Alternate Healthy Eating Index 2010, continuous).

**eTable 6. Body shape at age 5, 10, and 20 and risk of early-onset colorectal cancer**

|                                                    | Body Shape (Pictogram) |                  |                  |                      |
|----------------------------------------------------|------------------------|------------------|------------------|----------------------|
|                                                    | Average < 2.9          | Average 3-3.9    | Average ≥ 4      | P-trend <sup>c</sup> |
| <b>Average body shape at age 5, 10, 20</b>         |                        |                  |                  |                      |
| Cases                                              | 50                     | 39               | 22               |                      |
| Person-years                                       | 611,212                | 344,550          | 214,446          |                      |
| Age-adjusted RR (95% CI)                           | 1 [Reference]          | 1.40 (0.92-2.13) | 1.22 (0.74-2.03) | 0.17                 |
| Multivariable-adjusted RR (95% CI) <sup>a</sup>    | 1 [Reference]          | 1.37 (0.89-2.09) | 1.12 (0.67-1.87) | 0.33                 |
| Multivariable-adjusted RR (95% CI) <sup>a, b</sup> | 1 [Reference]          | 1.31 (0.86-2.01) | 1.02 (0.61-1.72) | 0.52                 |
| <b>Average body shape at age 10 and 20</b>         |                        |                  |                  |                      |
| Cases                                              | 41                     | 38               | 32               |                      |
| Person-years                                       | 536,131                | 358,462          | 275,615          |                      |
| Age-adjusted RR (95% CI)                           | 1 [Reference]          | 1.39 (0.89-2.16) | 1.50 (0.94-2.39) | 0.10                 |
| Multivariable-adjusted RR (95% CI) <sup>a</sup>    | 1 [Reference]          | 1.37 (0.88-2.14) | 1.39 (0.87-2.23) | 0.23                 |
| Multivariable-adjusted RR (95% CI) <sup>a, b</sup> | 1 [Reference]          | 1.33 (0.85-2.08) | 1.27 (0.79-2.06) | 0.40                 |
| <b>Body shape at age 20</b>                        |                        |                  |                  |                      |
| Cases                                              | 21                     | 42               | 48               |                      |
| Person-years                                       | 326,383                | 453,435          | 390,390          |                      |
| Age-adjusted RR (95% CI)                           | 1 [Reference]          | 1.44 (0.85-2.43) | 1.94 (1.16-3.24) | 0.05                 |
| Multivariable-adjusted RR (95% CI) <sup>a</sup>    | 1 [Reference]          | 1.44 (0.85-2.44) | 1.85 (1.10-3.12) | 0.13                 |
| Multivariable-adjusted RR (95% CI) <sup>a, b</sup> | 1 [Reference]          | 1.39 (0.82-2.35) | 1.71 (1.01-2.89) | 0.23                 |

Abbreviations: BMI, body mass index; CI, confidence interval; RR, relative risk. Participants who did not report their body shape were excluded in this analysis. Pictograms are graphical representation of body shape, ranging from 1 (most lean) to 9 (most overweight).

<sup>a</sup> Additionally adjusted for height (continuous), family history of CRC (yes/no), history of diabetes (yes/no), screening lower endoscopy within past 10 years (yes/no), lower endoscopy due to other indications within past 10 years (yes/no), smoking pack-years (continuous), physical activity (continuous), alcohol intake (continuous), regular use of aspirin (yes/no), NSAID (yes/no), multivitamin (yes/no), menopausal status (premenopausal or postmenopausal), menopausal hormone use (never, past, and current use of menopausal hormones), and dietary intake (total calories, red meat, fiber, folate, calcium, Alternate Healthy Eating Index 2010, continuous).

<sup>b</sup> Additionally adjusted for weight change since age 18.

<sup>c</sup> Calculated using (average) pictogram as a continuous variable.

**eTable 7. Change in body shape and risk of early-onset colorectal cancer**

|                                                    | Change in Pictogram |               |                  |                     | P-trend <sup>c</sup> |
|----------------------------------------------------|---------------------|---------------|------------------|---------------------|----------------------|
|                                                    | Decrease            | Remain stable | Increase 1 grade | Increase ≥ 2 grades |                      |
| <b>Change from age 5 to age 20</b>                 |                     |               |                  |                     |                      |
| Cases                                              | 17                  | 27            | 37               | 30                  |                      |
| Person-years                                       | 149,838             | 345,848       | 437,225          | 237,298             |                      |
| Age-adjusted RR (95% CI)                           | 1.45 (0.79-2.67)    | 1 [Reference] | 1.09 (0.66-1.79) | 1.66 (0.98-2.79)    | 0.25                 |
| Multivariable-adjusted RR (95% CI) <sup>a</sup>    | 1.42 (0.77-2.61)    | 1 [Reference] | 1.09 (0.66-1.80) | 1.60 (0.94-2.71)    | 0.27                 |
| Multivariable-adjusted RR (95% CI) <sup>a, b</sup> | 1.42 (0.77-2.62)    | 1 [Reference] | 1.06 (0.64-1.75) | 1.42 (0.79-2.56)    | 0.66                 |
| <b>Change from age 10 to age 20</b>                |                     |               |                  |                     |                      |
| Cases                                              | 18                  | 38            | 39               | 16                  |                      |
| Person-years                                       | 207,875             | 383,981       | 441,427          | 136,924             |                      |
| Age-adjusted RR (95% CI)                           | 0.87 (0.50-1.53)    | 1 [Reference] | 0.90 (0.57-1.40) | 1.19 (0.66-2.14)    | 0.48                 |
| Multivariable-adjusted RR (95% CI) <sup>a</sup>    | 0.84 (0.48-1.47)    | 1 [Reference] | 0.89 (0.57-1.40) | 1.14 (0.63-2.07)    | 0.48                 |
| Multivariable-adjusted RR (95% CI) <sup>a, b</sup> | 0.83 (0.47-1.47)    | 1 [Reference] | 0.85 (0.54-1.34) | 0.96 (0.50-1.83)    | 0.84                 |

Abbreviations: BMI, body mass index; CI, confidence interval; RR, relative risk. Participants who did not report their body shape were excluded in this analysis.

Pictograms are graphical representation of body shape, ranging from 1 (most lean) to 9 (most overweight).

<sup>a</sup> Additionally adjusted for height (continuous), family history of CRC (yes/no), history of diabetes (yes/no), screening lower endoscopy within past 10 years (yes/no), lower endoscopy due to other indications within past 10 years (yes/no), smoking pack-years (continuous), physical activity (continuous), alcohol intake (continuous), regular use of aspirin (yes/no), NSAID (yes/no), multivitamin (yes/no), menopausal status (premenopausal or postmenopausal), menopausal hormone use (never, past, and current use of menopausal hormones), and dietary intake (total calories, red meat, fiber, folate, calcium, Alternate Healthy Eating Index 2010, continuous).

<sup>b</sup> Additionally adjusted for pictogram at age 20.

<sup>c</sup> Calculated using change in pictogram as a continuous variable.



**eTable 8. BMI, weight change, and risk of colorectal cancer after age 50**

|                                              | Current BMI                                    |                             |                           |                        |                                   |                      |                              |
|----------------------------------------------|------------------------------------------------|-----------------------------|---------------------------|------------------------|-----------------------------------|----------------------|------------------------------|
|                                              | 18.5-22.9 kg/m <sup>2</sup>                    | 23-24.9 kg/m <sup>2</sup>   | 25-29.9 kg/m <sup>2</sup> | ≥ 30 kg/m <sup>2</sup> | Each 5 kg/m <sup>2</sup> increase | P-trend <sup>b</sup> | P-heterogeneity <sup>c</sup> |
| Cases                                        | 34                                             | 33                          | 43                        | 45                     |                                   |                      | 0.01                         |
| Person-years                                 | 569,181                                        | 302,580                     | 453,386                   | 379,939                |                                   |                      |                              |
| Age-adjusted model                           | 1 [Reference]                                  | 1.35 (0.83-2.18)            | 0.93 (0.59-1.46)          | 0.98 (0.62-1.53)       | 0.96 (0.84-1.09)                  | 0.49                 |                              |
| Multivariable-adjusted model <sup>a</sup>    | 1 [Reference]                                  | 1.37 (0.84-2.22)            | 0.93 (0.58-1.47)          | 0.94 (0.58-1.52)       | 0.94 (0.81-1.08)                  | 0.38                 |                              |
|                                              | BMI at age 18                                  |                             |                           |                        |                                   |                      |                              |
|                                              | < 18.5 kg/m <sup>2</sup>                       | 18.5-20.9 kg/m <sup>2</sup> | 21-22.9 kg/m <sup>2</sup> | ≥ 23 kg/m <sup>2</sup> | Each 5 kg/m <sup>2</sup> increase | P-trend <sup>b</sup> |                              |
| Cases                                        | 14                                             | 63                          | 36                        | 42                     |                                   |                      |                              |
| Person-years                                 | 212,887                                        | 730,278                     | 396,294                   | 365,627                |                                   |                      |                              |
| Age-adjusted model                           | 0.76 (0.43-1.36)                               | 1 [Reference]               | 1.07 (0.71-1.61)          | 1.37 (0.93-2.03)       | 1.18 (0.94-1.47)                  | 0.15                 |                              |
| Multivariable-adjusted model <sup>a</sup>    | 0.73 (0.41-1.30)                               | 1 [Reference]               | 1.09 (0.72-1.65)          | 1.39 (0.93-2.08)       | 1.19 (0.94-1.49)                  | 0.14                 |                              |
| Multivariable-adjusted model <sup>a, d</sup> | 0.74 (0.41-1.33)                               | 1 [Reference]               | 1.10 (0.73-1.67)          | 1.38 (0.92-2.06)       | 1.15 (0.92-1.44)                  | 0.23                 |                              |
|                                              | Weight change since age 18                     |                             |                           |                        |                                   |                      |                              |
|                                              | Weight Loss or Weight Gain < 5 kg <sup>d</sup> | Weight Gain 5 – 19.9 kg     | Weight Gain 20 – 39.9 kg  | Weight Gain ≥ 40 kg    | Each 5 kg Increase                | P-trend <sup>b</sup> |                              |
| Cases                                        | 36                                             | 64                          | 41                        | 14                     |                                   |                      |                              |
| Person-years                                 | 465,657                                        | 788,880                     | 362,771                   | 87,778                 |                                   |                      |                              |
| Age-adjusted model                           | 1 [Reference]                                  | 0.73 (0.49-1.11)            | 0.71 (0.45-1.11)          | 0.82 (0.44-1.52)       | 0.91 (0.82-1.02)                  | 0.11                 |                              |
| Multivariable-adjusted model <sup>a</sup>    | 1 [Reference]                                  | 0.72 (0.47-1.09)            | 0.67 (0.42-1.07)          | 0.70 (0.36-1.36)       | 0.89 (0.79-1.00)                  | 0.05                 |                              |
| Multivariable-adjusted model <sup>a, e</sup> | 1 [Reference]                                  | 0.76 (0.49-1.16)            | 0.70 (0.44-1.13)          | 0.72 (0.37-1.40)       | 0.90 (0.80-1.01)                  | 0.07                 |                              |

Note: Relative risk and 95% confidence interval is shown. Simple-updated BMI is used. BMI, body mass index.

<sup>a</sup> Additionally adjusted for height (continuous), family history of CRC (yes/no), history of diabetes (yes/no), screening lower endoscopy within past 10 years (yes/no), lower endoscopy due to other indications within past 10 years (yes/no), smoking pack-years (continuous), physical activity (continuous), alcohol intake (continuous), regular use of aspirin (yes/no), NSAID (yes/no), multivitamin (yes/no), menopausal status (premenopausal or postmenopausal), menopausal hormone use (never, past, and current use of menopausal hormones), and dietary intake (total calories, red meat, fiber, folate, calcium, Alternate Healthy Eating Index 2010, continuous).

<sup>b</sup> Calculated using current BMI, BMI at age 18, and weight change since age 18 as a continuous variable.

<sup>c</sup> Calculated using the log likelihood ratio test comparing models assuming a common effect between obesity and risk of CRC with models allowing separate associations between obesity and risk of CRC according to age strata (<50/≥50 years). The median follow-up duration for the cohort was 20.8 years.

<sup>d</sup> Additionally adjusted for weight change since age 18.

<sup>e</sup> Additionally adjusted for BMI at age 18.

**eFigure 1.** Non-parametric restricted cubic splines of (A) current BMI, (B) BMI at age 18, and (C) weight change since age 18 and risk of early-onset colorectal cancer. Dotted lines represent 95% confidence intervals.

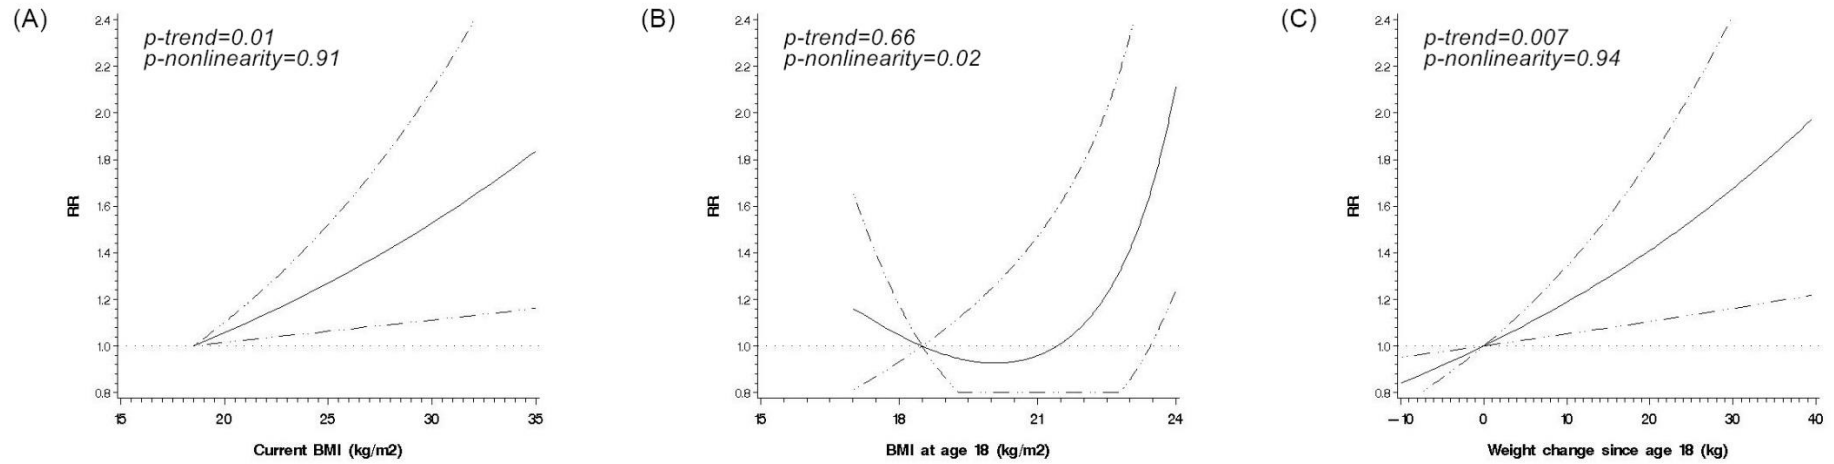

Supplement: jamaoncol-5-37-s001.pdf [file jamaoncol-5-37-s001.pdf]
